# Supplementary material for: Efficient fabrication of single-wall carbon nanotube nanoreactors by defect-induced cutting
Source: Royal Society of Chemistry journal article supplement (doi:10.1039/d2nr06696c), 2023-01-01
Supplement: d2nr06696c1.pdf [file d2nr06696c1.pdf]

## Supporting information

Calculation of the yield of c-SWCNTs:  $(L_c \times D_c) / (L_o \times D_o)$

Where,  $L_c$  is the average length of c-SWCNTs measured by AFM

$D_c$ : average areal density of c-SWCNTs measured by AFM

$L_o$ : average length of original SWCNTs measured by AFM

$D_o$ : average areal density of original SWCNTs measured by AFM

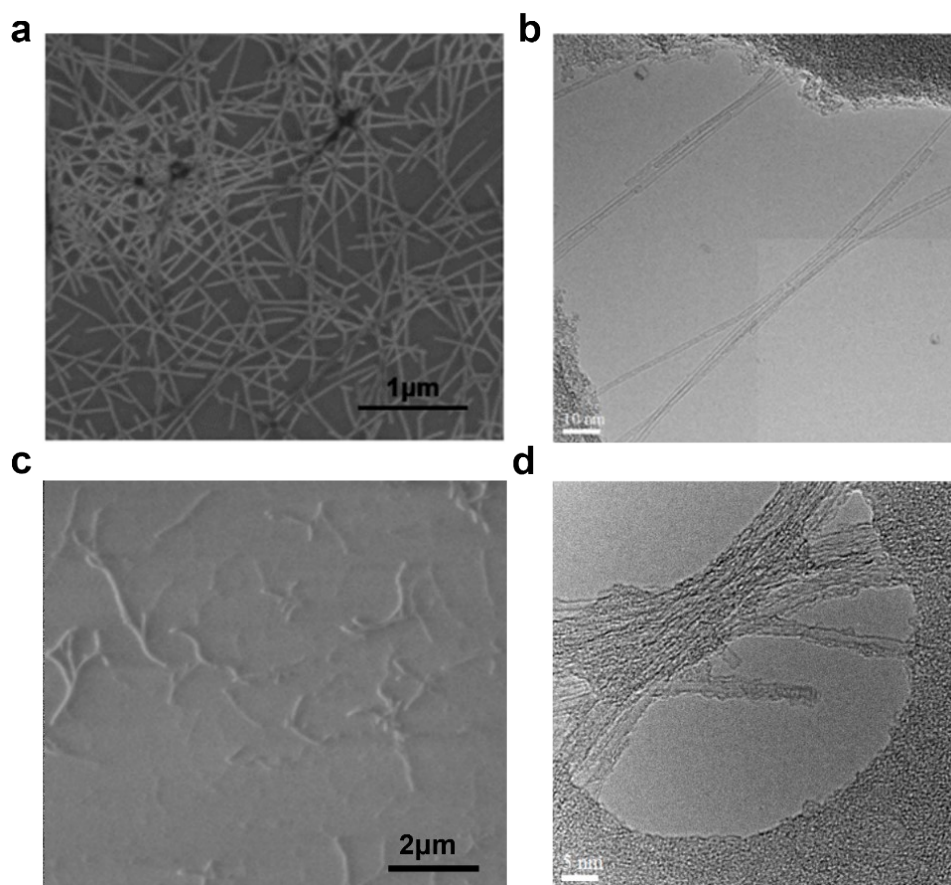

Fig. S1 Morphologies of (a-b) original, and (c-d) short c-SWCNTs.

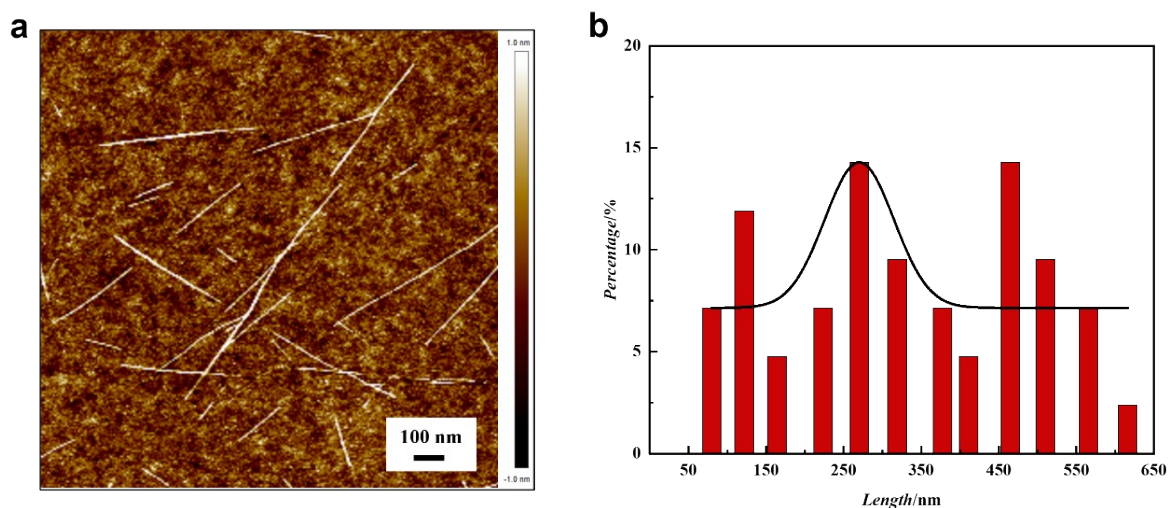

Fig. S2 Morphologies of short c-SWCNTs without defect introduction.

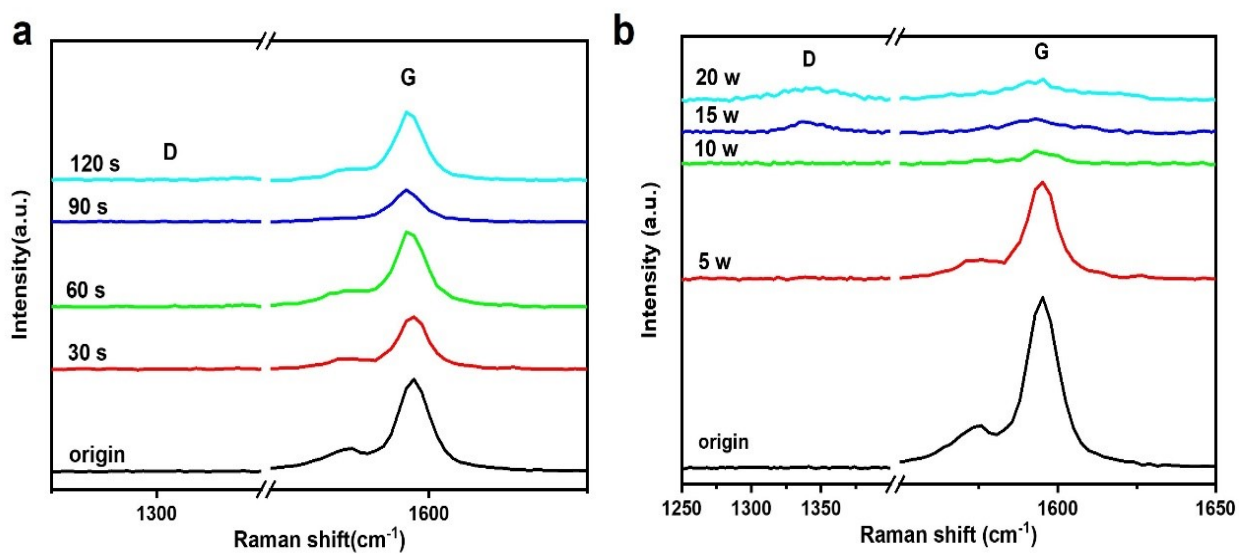

Fig. 3. G and D-mode Raman spectra of SWCNTs treated by H<sub>2</sub> plasma with different powers and time.

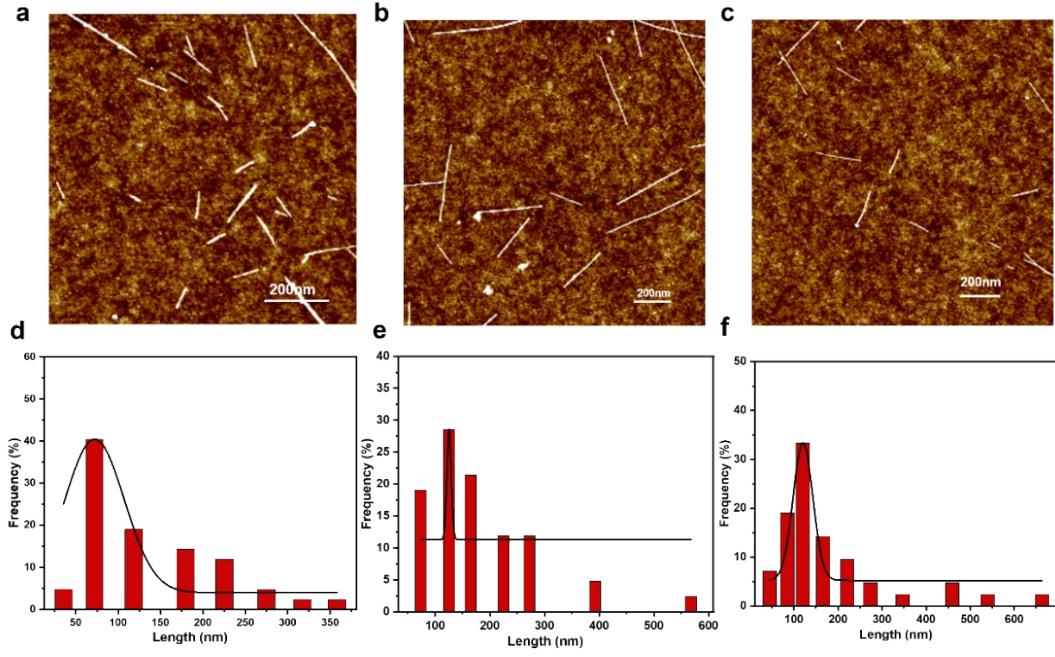

Fig. 4. AFM images of c-SWCNTs experienced H<sub>2</sub> plasma with powers of (a) 10 W, (b) 15 W, and (c) 20 W. (d), (e), and (f) show the length distribution of the SWCNTs based on AFM observations. The mean lengths of the c-SWCNTs shown in (a), (b), and (c) are 75 nm, 125 nm, and 120 nm, respectively.

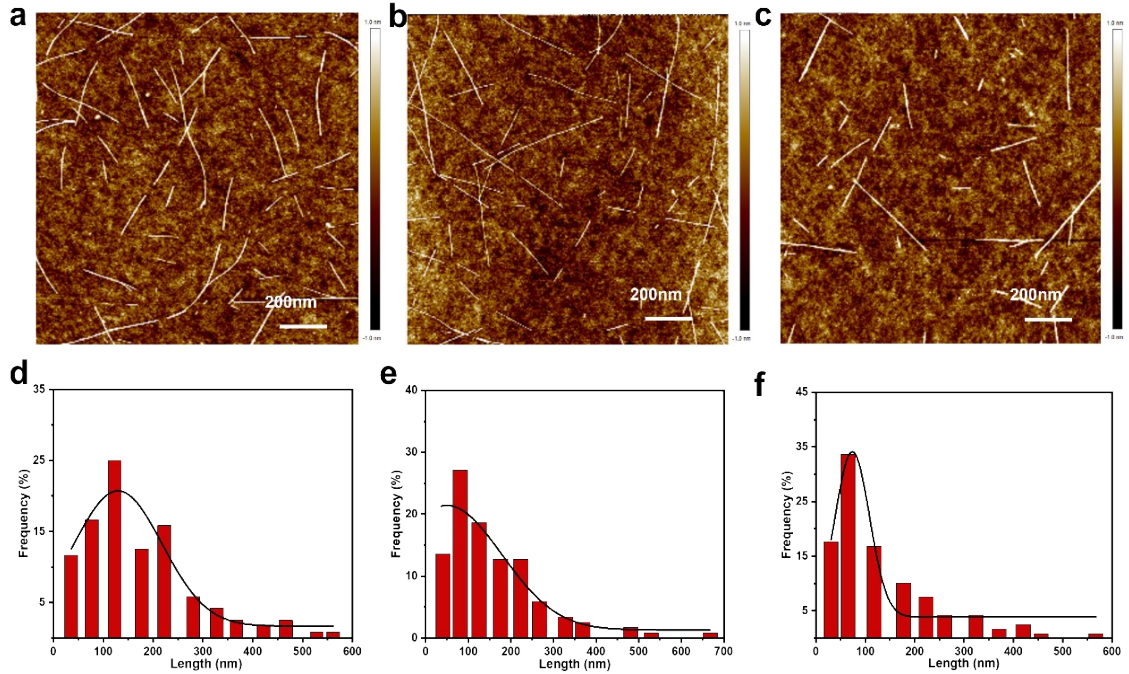

Fig. 5. AFM images (a-c) and length distributions (d-f) of the short-cut SWCNTs obtained by H<sub>2</sub>O etching reaction at (a, d) 750 °C, (b, e) 765 °C, and (c, f) 780 °C.

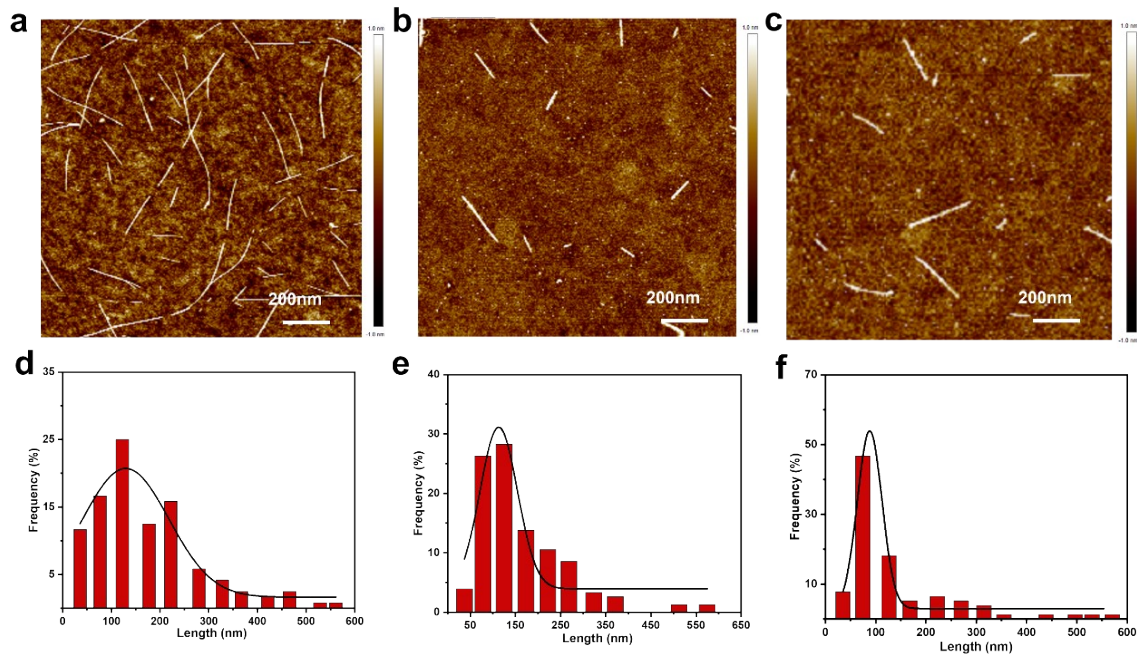

Fig. 6. AFM images (a-c) and length distributions (d-f) of the short-cut SWCNTs obtained by H<sub>2</sub>O etching reaction with H<sub>2</sub>O concentrations of (a, d) 1000 ppm, (b, e) 1500 ppm, (c, f) 2000 ppm.

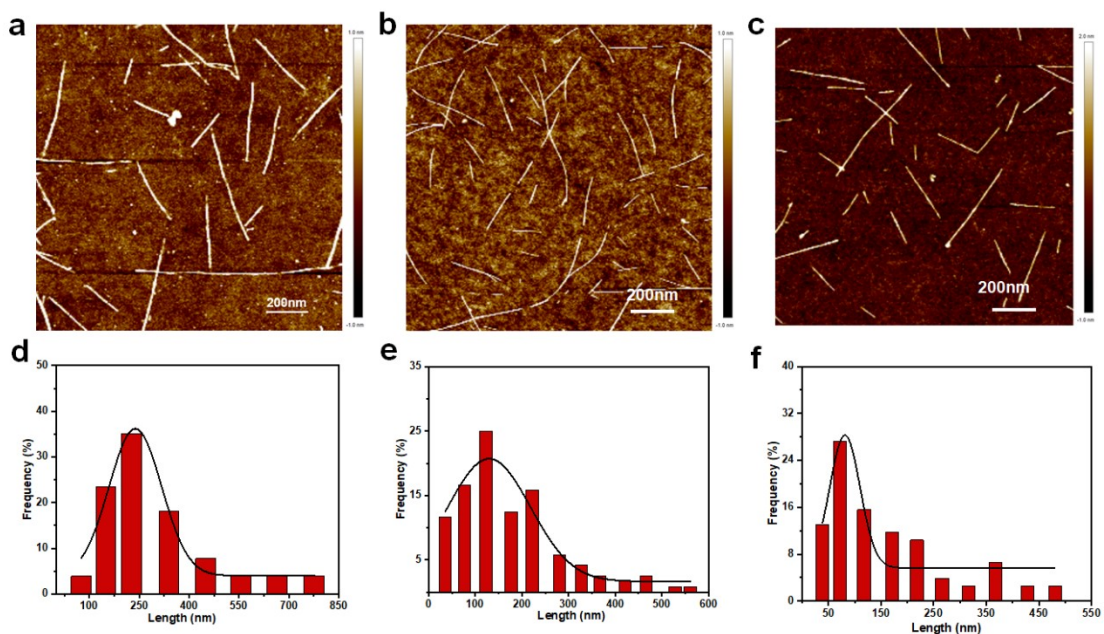

Fig. 7 AFM images of cut SWCNTs obtained using identical etching conditions except for the reaction time: (a, d) 4 min, (b, e) 5 min, (c, f) 6 min.. (d), (e), and (f) show the length distribution of the SWCNTs based on the measurement of AFM images.

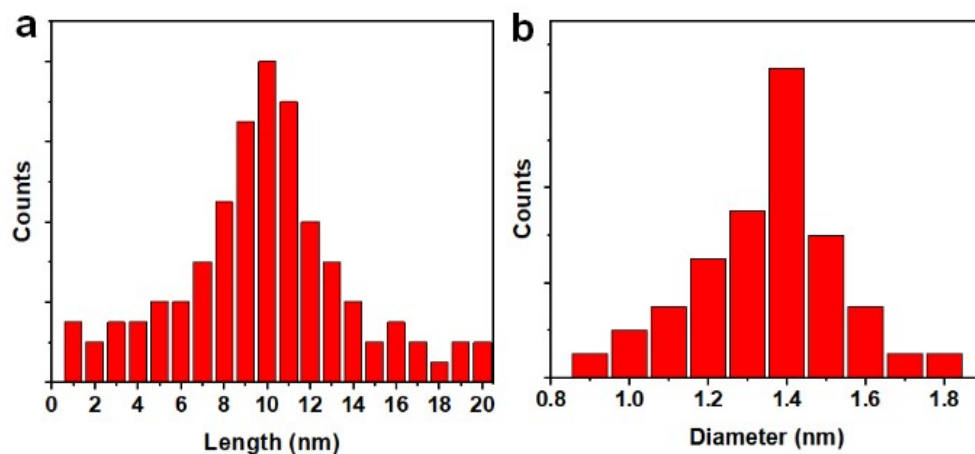

Fig. 8 Histograms of length and diameter of  $\text{WO}_3$  nanowires filled in SWCNT based on the measurement of TEM images. (a) Length and (b) diameter distribution of  $\text{WO}_3$  nanowires.
